# Supplementary material
Source: PubMed Central journal article supplement (PMC11105415)
Supplement: 18_2019_3086_MOESM1_ESM.pdf [file 18_2019_3086_MOESM1_ESM.pdf]

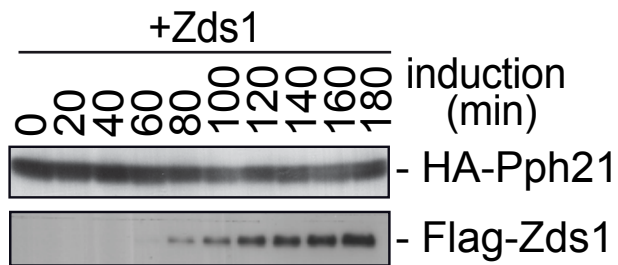

**Figure S1. Study of the Pph21 migration forms.** Strain Y610 was arrested in metaphase by Cdc20-depletion and Zds1 ectopic expression was induced by galactose addition. Pph21 and Zds1 proteins were analyzed by western blots. No changes in the Pph21 migrating isoforms were detected.
