# Supplementary material
Source: PubMed Central journal article supplement (PMC11105415)
Supplement: 18_2019_3086_MOESM2_ESM.pdf [file 18_2019_3086_MOESM2_ESM.pdf]

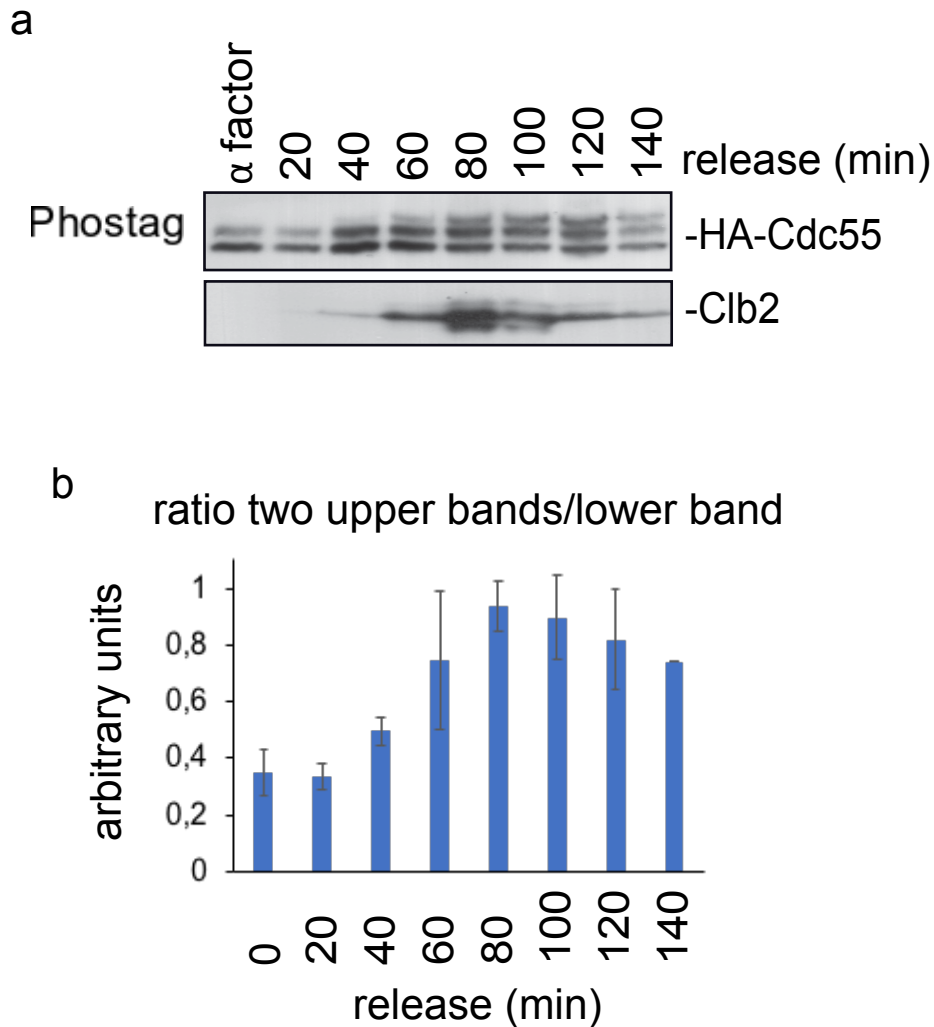

**Figure S2. Cdc55 is phosphorylated during mitosis.** Strain Y755 was synchronized in G1 with  $\alpha$ -factor and released into a synchronous cell cycle. Cdc55 phosphorylation was visualized using Phos-tag gels (a). Clb2 protein levels were used as a control of the mitotic progression. A quantification of three independent experiments is shown (b). Cdc55 slower migration isoform accumulated during mitosis.
