# Supplementary material
Source: PubMed Central journal article supplement (PMC11105415)
Supplement: 18_2019_3086_MOESM4_ESM.pdf [file 18_2019_3086_MOESM4_ESM.pdf]

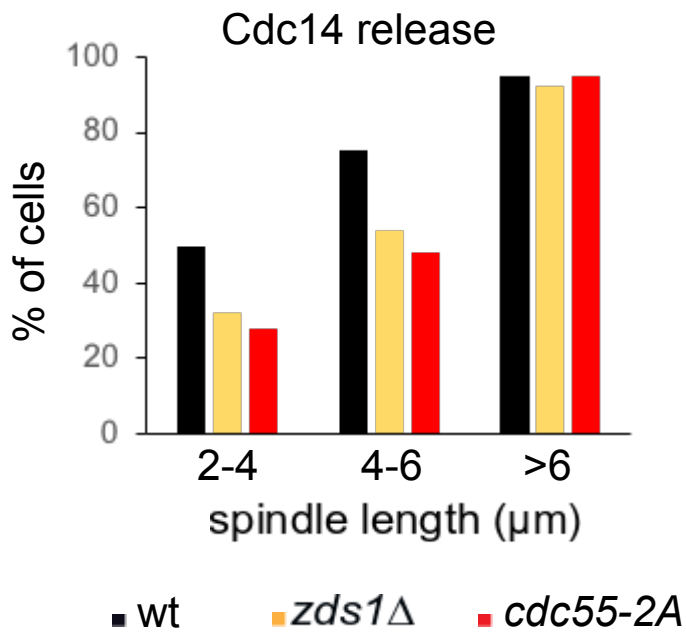

**Figure S4. Cdc14 release from the nucleolus in Cdc55 phospho-mutants.** Strains Y1649 and Y1651 were synchronized in G1 with  $\alpha$ -factor and released into a synchronous cell cycle. Cdc14 release from the nucleolus and anaphase spindles were monitored by immunofluorescence. Cdc14 nucleolar release was analyzed as a function of the spindle length. The strain Y3034 was used as a FEAR mutant control. At least 50 cells were scored for each spindle length.
