# Supplementary material
Source: PubMed Central journal article supplement (PMC11105415)
Supplement: 18_2019_3086_MOESM5_ESM.pdf [file 18_2019_3086_MOESM5_ESM.pdf]

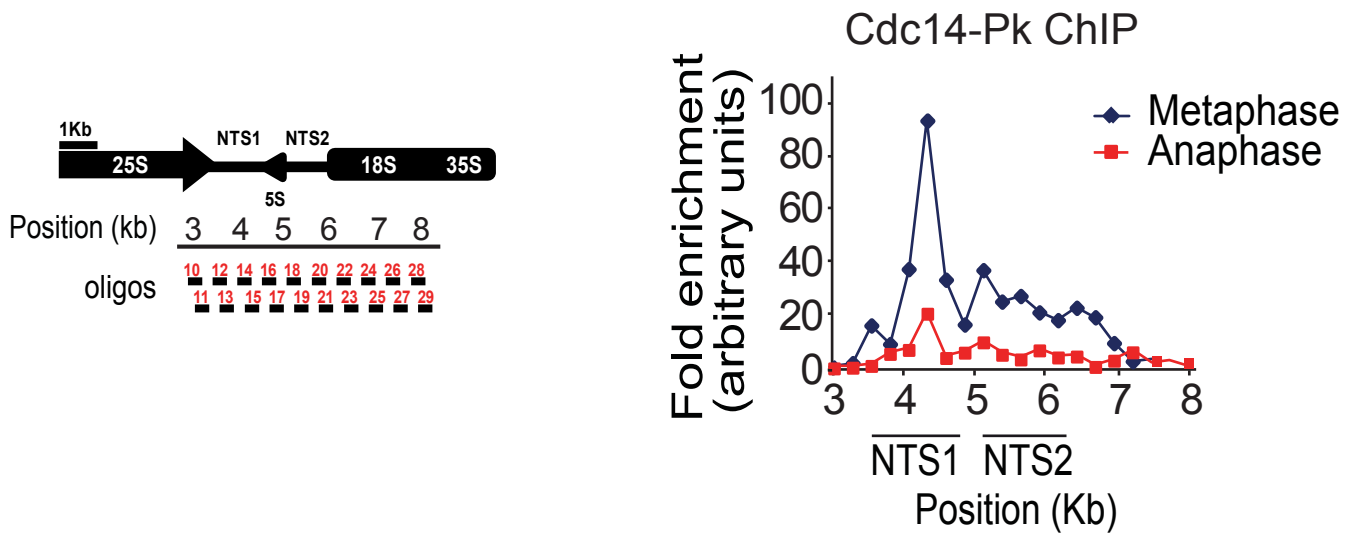

**Figure S5. Cdc14 release from the nucleolus can be detected by chromatin immunoprecipitation at the NTS1 and NTS2 regions of the rDNA.** Chromatin immunoprecipitation experiments using strain Y3227 were performed in metaphase and anaphase cells. A reduction in the amount of Cdc14 bound to the NTS1 and NTS2 regions is detected in anaphase.
